# Supplementary material for: Twelve-month effects of everolimus on renal and lung function in lung transplantation: differences in chronic lung allograft dysfunction phenotypes
Source: PubMed Central journal article supplement — Ther Adv Chronic Dis. 2021 Feb 24;12:2040622321993441. doi: 10.1177/2040622321993441 (PMC7925948; doi:10.1177/2040622321993441), 2021-02-24
Supplement: sj-pdf-1-taj-10.1177_2040622321993441.pdf [file sj-pdf-1-taj-10.1177_2040622321993441.pdf]

**Table S1.**

Percentage mean difference from baseline assessment (% $\Delta$   $\pm$  Standard Error) of renal function, pulmonary function and immunosuppressive dosage in all transplanted patients (n = 26)

|                             | Baseline-1st Month | Baseline-3rd Month | Baseline-6th Month | Baseline-12th Month | <i>P</i> |
|-----------------------------|--------------------|--------------------|--------------------|---------------------|----------|
| % $\Delta$ Creatinine       | -15.2 $\pm$ 17.5   | -17.3 $\pm$ 21.1   | -19.1 $\pm$ 22     | -17.3 $\pm$ 21      | 0.932    |
| % $\Delta$ eGFR             | 23.5 $\pm$ 37.2    | 30.1 $\pm$ 46.8    | 35.8 $\pm$ 48.1    | 24.0 $\pm$ 55.6     | 0.789    |
| % $\Delta$ FEV <sub>1</sub> | 4.5 $\pm$ 2.8      | -1.2 $\pm$ 4.1     | -0.1 $\pm$ 5.7     | 0.5 $\pm$ 7.2       | 0.832    |
| % $\Delta$ FVC              | 4.6 $\pm$ 2.0      | 1.1 $\pm$ 2.9      | 0.07 $\pm$ 3.9     | 0.2 $\pm$ 3.3       | 0.687    |
| % $\Delta$ ISD              | -37.7 $\pm$ 5.5    | -41.8 $\pm$ 5.8    | -34.7 $\pm$ 6.1    | -49.9 $\pm$ 6.7     | 0.375    |

EGFR, estimated glomerular filtration rate; FEV<sub>1</sub>, forced expiratory volume in 1st second; FVC, forced vital capacity; ISD, immunosuppressive dosage.

**Table S2.**

Percentage mean difference from baseline assessment ( $\% \Delta \pm$  Standard Error) of pulmonary function in CLAD (n = 17) and non-CLAD (n = 9) patients.

|                                               | <b>Group</b>        | <b>Baseline-1st month</b> | <b>Baseline-3rd month</b> | <b>Baseline-6th month</b> | <b>Baseline-12th month</b> | <b><i>P</i></b> |
|-----------------------------------------------|---------------------|---------------------------|---------------------------|---------------------------|----------------------------|-----------------|
| <b><math>\% \Delta</math> FEV<sub>1</sub></b> | CLAD                | 5.8 ± 4.1                 | -5.0 ± 5.6                | -7.5 ± 6.8                | -10.8 ± 9.7                | 0.281           |
|                                               | Non-CLAD            | 2.2 ± 3.0                 | 5.8 ± 5.2                 | 11.2 ± 9.3                | 14.8 ± 9.1                 | 0.613           |
|                                               | <i>P</i> difference | 0.561                     | 0.219                     | 0.109                     | 0.078                      |                 |
| <b><math>\% \Delta</math> FVC</b>             | CLAD                | 4.8 ± 2.9                 | 0.4 ± 4.3                 | -4.5 ± 5.5                | -5.7 ± 4.7                 | 0.337           |
|                                               | Non-CLAD            | 4.4 ± 2.5                 | 2.5 ± 2.7                 | 7.2 ± 4.5                 | 7.7 ± 3.3                  | 0.529           |
|                                               | <i>P</i> difference | 0.929                     | 0.736                     | 0.151                     | 0.043                      |                 |

CLAD, chronic lung allograft dysfunction; FEV<sub>1</sub>, forced expiratory volume in 1st second; FVC, forced vital capacity.

**Table S3.**

Percentage mean difference from baseline assessment ( $\% \Delta \pm$  Standard Error) of pulmonary function in RAS (n = 7) and BOS (n = 10) patients.

|                                               | <b>Group</b>        | <b>Baseline-1st month</b> | <b>Baseline-3rd month</b> | <b>Baseline-6th month</b> | <b>Baseline-12th month</b> | <b><i>P</i></b> |
|-----------------------------------------------|---------------------|---------------------------|---------------------------|---------------------------|----------------------------|-----------------|
| <b><math>\% \Delta</math> FEV<sub>1</sub></b> | BOS                 | 8.0 $\pm$ 4.8             | 1.6 $\pm$ 6.0             | 4.4 $\pm$ 6.8             | -0.8 $\pm$ 11.6            | 0.839           |
|                                               | RAS                 | 2.9 $\pm$ 7.5             | -14.6 $\pm$ 9.9           | -23.5 $\pm$ 10.2          | -25.8 $\pm$ 15.9           | 0.214           |
|                                               | <i>P</i> difference | 0.558                     | 0.159                     | 0.034                     | 0.229                      |                 |
| <b><math>\% \Delta</math> FVC</b>             | BOS                 | 6.9 $\pm$ 5.1             | 6.6 $\pm$ 6.2             | 4.6 $\pm$ 6.7             | -3.4 $\pm$ 7.0             | 0.691           |
|                                               | RAS                 | 2.2 $\pm$ 1.7             | -8.4 $\pm$ 4.1            | -16.6 $\pm$ 7.1           | -9.2 $\pm$ 6.5             | 0.071           |
|                                               | <i>P</i> difference | 0.454                     | 0.088                     | 0.053                     | 0.584                      |                 |

BOS, bronchiolitis obliterans syndrome; FEV<sub>1</sub>, forced expiratory volume in 1st second; FVC, forced vital capacity; RAS, restrictive allograft syndrome.

**Table S4.**

Percentage mean difference from baseline assessment ( $\% \Delta \pm$  Standard Error) of pulmonary function and immunosuppressive dosage in RAS (n = 7), BOS (n = 10) and non-CLAD (n = 9) patients.

|                                               | <b>Group</b>        | <b>Baseline-1st month</b> | <b>Baseline-3rd month</b> | <b>Baseline-6th month</b> | <b>Baseline-12th month</b> |
|-----------------------------------------------|---------------------|---------------------------|---------------------------|---------------------------|----------------------------|
| <b><math>\% \Delta</math> FEV<sub>1</sub></b> | RAS                 | 2.9 $\pm$ 7.5             | -14.6 $\pm$ 9.9           | -23.5 $\pm$ 10.2          | -25.8 $\pm$ 15.9           |
|                                               | BOS                 | 8.0 $\pm$ 4.8             | 1.6 $\pm$ 6.0             | 4.4 $\pm$ 6.8             | -0.8 $\pm$ 11.6            |
|                                               | Non-CLAD            | 2.2 $\pm$ 3.0             | 5.8 $\pm$ 5.2             | 11.2 $\pm$ 9.3            | 14.8 $\pm$ 9.1             |
|                                               | <i>P</i> difference | 0.666                     | 0.137                     | 0.037                     | 0.091                      |
| <b><math>\% \Delta</math> FVC</b>             | RAS                 | 2.2 $\pm$ 1.7             | -8.4 $\pm$ 4.1            | -16.6 $\pm$ 7.1           | -9.2 $\pm$ 6.5             |
|                                               | BOS                 | 6.9 $\pm$ 5.1             | 6.6 $\pm$ 6.2             | 4.6 $\pm$ 6.7             | -3.4 $\pm$ 7.0             |
|                                               | Non-CLAD            | 4.4 $\pm$ 2.5             | 2.5 $\pm$ 2.7             | 7.2 $\pm$ 4.5             | 7.7 $\pm$ 3.3              |
|                                               | <i>P</i> difference | 0.685                     | 0.121                     | 0.031                     | 0.112                      |
| <b><math>\% \Delta</math> ISD</b>             | BOS                 | -26.0 $\pm$ 10.7          | -37.2 $\pm$ 9.7           | -25.9 $\pm$ 11.9          | -45.0 $\pm$ 8.2            |
|                                               | RAS                 | -47.1 $\pm$ 5.9           | -34.2 $\pm$ 13.4          | -31.3 $\pm$ 8.4           | -53.3 $\pm$ 9.9            |
|                                               | Non-CLAD            | -43.3 $\pm$ 9.2           | -52.9 $\pm$ 7.7           | -45.2 $\pm$ 9.1           | -51.6 $\pm$ 12.9           |
|                                               | <i>P</i> difference | 0.254                     | 0.395                     | 0.388                     | 0.893                      |

BOS, bronchiolitis obliterans syndrome; CLAD, chronic lung allograft dysfunction; FEV<sub>1</sub>, forced expiratory volume in 1st second; FVC, forced vital capacity; ISD, immunosuppressive dosage; RAS, restrictive allograft syndrome.

**Table S5.**

Means ( $\pm$  Standard Error) of pulmonary function in non-CLAD (n = 9) versus RAS (n = 7) and BOS (n = 10) patients separately.

|                        | <b>Group</b>        | <b>Baseline</b> | <b>1 Month</b> | <b>3 Month</b>  | <b>6 Month</b> | <b>12 Month</b> |
|------------------------|---------------------|-----------------|----------------|-----------------|----------------|-----------------|
| <b>FEV<sub>1</sub></b> | BOS                 | 46.7 $\pm$ 6.2  | 49.5 $\pm$ 6.9 | 47.1 $\pm$ 6.8  | 48.5 $\pm$ 8.8 | 51.0 $\pm$ 9.7  |
|                        | Non-CLAD            | 74.8 $\pm$ 7.1  | 76.1 $\pm$ 7.3 | 78.0 $\pm$ 7.3  | 80.3 $\pm$ 6.9 | 77.8 $\pm$ 5.2  |
|                        | <i>P</i> difference | 0.008           | 0.002          | 0.0003          | 0.0006         | 0.009           |
| <b>FVC</b>             | BOS                 | 77.6 $\pm$ 4.6  | 80.4 $\pm$ 5.6 | 82.3 $\pm$ 5.9  | 79.1 $\pm$ 8.3 | 81.0 $\pm$ 5.5  |
|                        | Non-CLAD            | 81.8 $\pm$ 4.7  | 85.4 $\pm$ 5.2 | 83.6 $\pm$ 4.8  | 87.5 $\pm$ 5.6 | 84.1 $\pm$ 3.9  |
|                        | <i>P</i> difference | 0.283           | 0.082          | 0.534           | 0.167          | 0.015           |
| <b>FEV<sub>1</sub></b> | RAS                 | 59.2 $\pm$ 2.0  | 60.2 $\pm$ 2.7 | 50.0 $\pm$ 5.2  | 44.8 $\pm$ 6.3 | 44.2 $\pm$ 9.6  |
|                        | Non-CLAD            | 74.8 $\pm$ 7.1  | 76.1 $\pm$ 7.3 | 78.0 $\pm$ 7.36 | 80.3 $\pm$ 6.9 | 77.8 $\pm$ 5.25 |
|                        | <i>P</i> difference | 0.176           | 0.166          | 0.042           | 0.027          | 0.056           |
| <b>FVC</b>             | RAS                 | 70.0 $\pm$ 5.7  | 71.8 $\pm$ 6.9 | 63.4 $\pm$ 4.2  | 53.1 $\pm$ 3.2 | 56.5 $\pm$ 2.9  |
|                        | Non-CLAD            | 81.8 $\pm$ 4.7  | 85.4 $\pm$ 5.2 | 83.6 $\pm$ 4.8  | 87.5 $\pm$ 5.6 | 84.1 $\pm$ 3.9  |
|                        | <i>P</i> difference | 0.217           | 0.161          | 0.024           | 0.013          | 0.020           |

BOS, bronchiolitis obliterans syndrome; CLAD, chronic lung allograft dysfunction; FEV<sub>1</sub>, forced expiratory volume in 1st second; FVC, forced vital capacity; RAS, restrictive allograft syndrome.
